# Supplementary material for: The Development of the Genital Psoriasis Sexual Frequency Questionnaire (GenPs-SFQ) to Assess the Impact of Genital Psoriasis on Sexual Health
Source: Springer Nature journal article supplement (doi:10.1007/s13555-017-0212-3), 2017-12-04
Supplement: MOESM1 [file 15277162]

## Supplemental Materials

**Table S1. Search Strategy: Impact on Sexual Function Measures**

| No. | Query                                                                                                                                                                                                                                                                                                                                                                                                                                                                                                                                                                                                                                                                                                                                                                                                                                                                                                                                        | Results        |
|-----|----------------------------------------------------------------------------------------------------------------------------------------------------------------------------------------------------------------------------------------------------------------------------------------------------------------------------------------------------------------------------------------------------------------------------------------------------------------------------------------------------------------------------------------------------------------------------------------------------------------------------------------------------------------------------------------------------------------------------------------------------------------------------------------------------------------------------------------------------------------------------------------------------------------------------------------------|----------------|
| #1  | 'psoriasis'/exp/mj OR psoriasis:ti                                                                                                                                                                                                                                                                                                                                                                                                                                                                                                                                                                                                                                                                                                                                                                                                                                                                                                           | <b>35439</b>   |
| #2  | 'sexual dysfunction'/exp/mj OR (sex* NEAR/3 (dysfunction OR disorder* OR abnormality OR problem OR disability OR insufficiency)):ab,ti OR 'sexuality'/exp OR 'sexual distress'                                                                                                                                                                                                                                                                                                                                                                                                                                                                                                                                                                                                                                                                                                                                                               | <b>226451</b>  |
| #3  | sex:ab,ti AND ('quality of life'/exp OR 'quality of life' OR 'HRQOL':ab,ti OR hrqol:ab,ti OR qol:ab,ti OR 'life quality' OR 'well-being' OR 'wellbeing'/exp)                                                                                                                                                                                                                                                                                                                                                                                                                                                                                                                                                                                                                                                                                                                                                                                 | <b>11678</b>   |
| #4  | 'interview'/exp OR interview*:ab,ti OR 'questionnaire'/exp OR questionnaire*:ab,ti OR survey*:ab,ti OR 'rating scale'/exp OR (scale*:ab,ti NOT 'large scale':ab,ti) OR measure*:ab,ti OR 'measurement'/exp OR assessment*:ab,ti OR index*:ab,ti OR diar*:ab,ti OR inventor*:ab,ti OR score*:ab,ti OR profile:ab,ti OR profiles:ab,ti OR 'named inventories, questionnaires and rating scales'/exp OR 'quality of life'/exp OR 'quality of life' OR 'HRQOL':ab,ti OR hrqol:ab,ti OR qol:ab,ti OR 'life quality' OR 'well-being' OR 'wellbeing'/exp OR 'value of life' OR qualitative:ab,ti OR 'qualitative research'/exp OR patient* NEAR/1 assess* OR 'self evaluation' OR 'self evaluations' OR patient* NEAR/2 rating OR patient* NEAR/2 rated OR 'self-completed' OR 'self-administered' OR self NEAR/1 assessment* OR 'self-rated' OR 'patient based outcome' OR 'self evaluation'/exp OR experience*:ab,ti OR 'patient completed':ab,ti | <b>7433125</b> |
| #5  | #4 AND #3 AND #1 AND ([article]/lim OR [article in press]/lim OR [review]/lim) AND [english]/lim                                                                                                                                                                                                                                                                                                                                                                                                                                                                                                                                                                                                                                                                                                                                                                                                                                             | <b>34</b>      |
| #6  | #4 AND #3 AND #1 AND ([conference abstract]/lim OR [conference paper]/lim) AND [english]/lim AND [2012-2015]/py                                                                                                                                                                                                                                                                                                                                                                                                                                                                                                                                                                                                                                                                                                                                                                                                                              | <b>28</b>      |
| #7  | #4 AND #2 AND #1 AND ([article]/lim OR [article in press]/lim OR [review]/lim) AND [english]/lim                                                                                                                                                                                                                                                                                                                                                                                                                                                                                                                                                                                                                                                                                                                                                                                                                                             | <b>32</b>      |
| #8  | #4 AND #2 AND #1 AND ([conference abstract]/lim OR [conference paper]/lim) AND [english]/lim AND [2012-2015]/py                                                                                                                                                                                                                                                                                                                                                                                                                                                                                                                                                                                                                                                                                                                                                                                                                              | <b>13</b>      |
| #9  | #5 OR #7                                                                                                                                                                                                                                                                                                                                                                                                                                                                                                                                                                                                                                                                                                                                                                                                                                                                                                                                     | <b>62</b>      |
| #10 | #6 OR #8                                                                                                                                                                                                                                                                                                                                                                                                                                                                                                                                                                                                                                                                                                                                                                                                                                                                                                                                     | <b>38</b>      |
|     | <b>Total</b>                                                                                                                                                                                                                                                                                                                                                                                                                                                                                                                                                                                                                                                                                                                                                                                                                                                                                                                                 | <b>100</b>     |
